# Supplementary material for: Comprehensive analysis of spectral distribution of a large cohort of Chinese patients with non‐syndromic oculocutaneous albinism facilitates genetic diagnosis
Source: PubMed Central journal article supplement — Pigment Cell Melanoma Res. 2019 May 29;32(5):672–86. doi: 10.1111/pcmr.12790 (PMC6852118; doi:10.1111/pcmr.12790), 2019-05-29
Supplement: PCMR-32-672-s001.pdf [file PCMR-32-672-s001.pdf]

**Table S1. Primers for identification of variants in known OCA genes**

| Primers name   | Primers Sequence            | Purpose                       | conditions |                                  |                                                                                                                                                                                                                 |
|----------------|-----------------------------|-------------------------------|------------|----------------------------------|-----------------------------------------------------------------------------------------------------------------------------------------------------------------------------------------------------------------|
| TYR-EXON1A-F   | ccagttcctgcagacctgt         | Screening<br>TYR mutation     |            |                                  |                                                                                                                                                                                                                 |
| TYR-EXON1A-R   | tcattggccataggtccct         |                               |            |                                  |                                                                                                                                                                                                                 |
| TYR-EXON1B-F   | gggaccaaactgcacagaga        |                               |            |                                  |                                                                                                                                                                                                                 |
| TYR-EXON1B-R   | ggctgcaatgagtggtcagg        |                               |            |                                  |                                                                                                                                                                                                                 |
| TYR-EXON2-F    | tgatggatttctcagaacatatccct  |                               |            |                                  |                                                                                                                                                                                                                 |
| TYR-EXON2-R    | acaacacatatcttggtcaactca    |                               |            |                                  |                                                                                                                                                                                                                 |
| TYR-EXON3-F    | tgggataatcacataggtttcagt    |                               |            |                                  |                                                                                                                                                                                                                 |
| TYR-EXON3-R    | ggtgacaacctgatcacagaca      |                               |            |                                  |                                                                                                                                                                                                                 |
| TYR-EXON4F     | ccatgtctccagatttaatatatgcc  |                               |            |                                  |                                                                                                                                                                                                                 |
| TYR-EXON4R     | cactttcaggatttaaagtggtcagga |                               |            |                                  |                                                                                                                                                                                                                 |
| TYR-EXON5-F    | gccttcaaaccagggtgtct        |                               |            |                                  |                                                                                                                                                                                                                 |
| TYR-EXON5-R    | ggaacctggacattactttgagt     |                               |            |                                  |                                                                                                                                                                                                                 |
| SLC45A2-EXON1F | ataacttgatcttagaggcagga     |                               |            | Screening<br>SLC45A2<br>mutation | All primers<br>were<br>amplified<br>using a<br>touch-down<br>program<br>beginning at<br>64°C,<br>decreasing by<br>0.5°C each<br>cycle, until<br>finishing at a<br>final<br>annealing<br>temperature<br>of 57°C. |
| SLC45A2-EXON1R | ggaagttcattgtaacctaggagag   |                               |            |                                  |                                                                                                                                                                                                                 |
| SLC45A2-EXON2F | ggtggaaattacaaacgcgg        |                               |            |                                  |                                                                                                                                                                                                                 |
| SLC45A2-EXON2R | cagaaactgcagcactagtca       |                               |            |                                  |                                                                                                                                                                                                                 |
| SLC45A2-EXON3F | tgcatgaggaaaatgaacgat       |                               |            |                                  |                                                                                                                                                                                                                 |
| SLC45A2-EXON3R | accccatgaaactcttctcgt       |                               |            |                                  |                                                                                                                                                                                                                 |
| SLC45A2-EXON4F | tccatgtccaggaaaagtgac       |                               |            |                                  |                                                                                                                                                                                                                 |
| SLC45A2-EXON4R | caggctccgtagtgctctct        |                               |            |                                  |                                                                                                                                                                                                                 |
| SLC45A2-EXON5F | gacttggatgacagcatca         |                               |            |                                  |                                                                                                                                                                                                                 |
| SLC45A2-EXON5R | caagagcaaagtaatcagtgagga    |                               |            |                                  |                                                                                                                                                                                                                 |
| SLC45A2-EXON6F | caaaagccagctgtttcaac        |                               |            |                                  |                                                                                                                                                                                                                 |
| SLC45A2-EXON6R | gtgagcatgcctgtaccagat       |                               |            |                                  |                                                                                                                                                                                                                 |
| SLC45A2-EXON7F | tgtgccctaaatgacagtcc        |                               |            |                                  |                                                                                                                                                                                                                 |
| SLC45A2-EXON7R | caatgggcagaccctaagatt       |                               |            |                                  |                                                                                                                                                                                                                 |
| OCA2-EXON2F    | actcccaaggtgcaaacgft        | Screening<br>OCA2<br>mutation |            |                                  |                                                                                                                                                                                                                 |
| OCA2-EXON2R    | cacaacaaactgtgggggaac       |                               |            |                                  |                                                                                                                                                                                                                 |
| OCA2-EXON3F    | tggtgtcttctaaaactcagcc      |                               |            |                                  |                                                                                                                                                                                                                 |
| OCA2-EXON3R    | gtcaaggatctggcagaggft       |                               |            |                                  |                                                                                                                                                                                                                 |
| OCA2-EXON4F    | ccattcccaccagtatgaga        |                               |            |                                  |                                                                                                                                                                                                                 |
| OCA2-EXON4R    | cctggccagatgagacaaaac       |                               |            |                                  |                                                                                                                                                                                                                 |
| OCA2-EXON5F    | tgtgggttactggtcactgat       |                               |            |                                  |                                                                                                                                                                                                                 |
| OCA2-EXON5R    | cctcagcatctcctcaaaga        |                               |            |                                  |                                                                                                                                                                                                                 |
| OCA2-EXON6F    | taatcagggcccattgtagct       |                               |            |                                  |                                                                                                                                                                                                                 |
| OCA2-EXON6R    | ctccatctctcatcagacatcct     |                               |            |                                  |                                                                                                                                                                                                                 |
| OCA2-EXON7F    | gggacatggggttctcctg         |                               |            |                                  |                                                                                                                                                                                                                 |
| OCA2-EXON7R    | cctgtggctccccatcaaat        |                               |            |                                  |                                                                                                                                                                                                                 |
| OCA2-EXON8F    | ggtgtctcaggtgaaaagcc        |                               |            |                                  |                                                                                                                                                                                                                 |
| OCA2-EXON8R    | agccttgagctcactgtcta        |                               |            |                                  |                                                                                                                                                                                                                 |
| OCA2-EXON9F    | ctcactgttcattgtcgggtg       |                               |            |                                  |                                                                                                                                                                                                                 |
| OCA2-EXON9R    | gagagagggacacgctaact        |                               |            |                                  |                                                                                                                                                                                                                 |
| OCA2-EXON10F   | tagctgtatgtgtctgtggg        |                               |            |                                  |                                                                                                                                                                                                                 |
| OCA2-EXON10R   | tctagcatggttctgggcaa        |                               |            |                                  |                                                                                                                                                                                                                 |
| OCA2-EXON11F   | ccaacttcaaaggcaagtga        |                               |            |                                  |                                                                                                                                                                                                                 |

|              |                           |
|--------------|---------------------------|
| OCA2-EXON11R | atagccccattccattcctcc     |
| OCA2-EXON12F | gtgacggctttctgcatctc      |
| OCA2-EXON12R | tagcaagtataccctgccctg     |
| OCA2-EXON13F | gactccgtgggtctatgtctt     |
| OCA2-EXON13R | gtactgcagtcacacaaagca     |
| OCA2-EXON14F | aggctcactctggaaaggaat     |
| OCA2-EXON14R | ggtggcgtgatgatcttgatt     |
| OCA2-EXON15F | ctgcaagtccgcctctc         |
| OCA2-EXON15R | agcagccctgaaaacagtgta     |
| OCA2-EXON16F | tgttgaaattgcattactcgct    |
| OCA2-EXON16R | cacaccaagcacagtctgag      |
| OCA2-EXON17F | ccatgactagtcctgccagc      |
| OCA2-EXON17R | ttgctttccacatcctcaca      |
| OCA2-EXON18F | cctgaatctgtacgggttcc      |
| OCA2-EXON18R | gatgcatctctctccctcc       |
| OCA2-EXON19F | aggttaaagaaatgaatcgggtg   |
| OCA2-EXON19R | gtcagaaatctctcagtgctaag   |
| OCA2-EXON20F | ggttctaaactgattctcaccac   |
| OCA2-EXON20R | cctgcagcactcattactga      |
| OCA2-EXON21F | tcgtgatgggtaagaggaagg     |
| OCA2-EXON21R | cttaggaagggagggtgagc      |
| OCA2-EXON22F | ccgtataagagccacaacagc     |
| OCA2-EXON22R | atcagaaccagtcaccccag      |
| OCA2-EXON23F | cttgcggtgtgtgtgtttcc      |
| OCA2-EXON23R | aatctcccctacaccacagtc     |
| OCA2-EXON24F | ttgcacacaatggaggatgtc     |
| OCA2-EXON24R | ggagaaaggcacacagagga      |
| TYRP1-EXON2F | ttcctctacgtctcagctc       |
| TYRP1-EXON2R | agagccttgagtctcatgcag     |
| TYRP1-EXON3F | ggataaatgggtcggtgtg       |
| TYRP1-EXON3R | acgaaatgccaagacaggtt      |
| TYRP1-EXON4F | aggtttaactcctctgggcc      |
| TYRP1-EXON4R | gcactttctgtttcccctgg      |
| TYRP1-EXON5F | tctacttgattcaaagaaatgggac |
| TYRP1-EXON5R | gaaaagagctcatggtgactc     |
| TYRP1-EXON6F | cataggtacagagaagcagtc     |
| TYRP1-EXON6R | aagtgactgatattacagctatgc  |
| TYRP1-EXON7F | ttctcctgaatattggatgcct    |
| TYRP1-EXON7R | agaataccgtgattactctactga  |
| TYRP1-EXON8F | ccaatagggccactcattaaaga   |
| TYRP1-EXON8R | agtatgcctagaactttaatgtaac |

Screening  
TYRP1  
mutation

|                           |                                  |                |           |
|---------------------------|----------------------------------|----------------|-----------|
| SLC24A5-EXON1F            | agcagagccagtatgaagaca            |                |           |
| SLC24A5-EXON1R            | aaactggagacttggcctact            |                |           |
| SLC24A5-EXON2F            | gcgctttatacattttcagtg            |                |           |
| SLC24A5-EXON2R            | cgaccagttccttaagacacg            |                |           |
| SLC24A5-EXON3-4F          | attcccttagtctcctggcc             |                |           |
| SLC24A5-EXON3-4R          | ttagtgccctgtgtccatcc             |                |           |
| SLC24A5-EXON5F            | ccacaaatagctcttggtcaga           |                |           |
| SLC24A5-EXON5R            | gaaggaaaagtgggtgtctcc            | Screening      |           |
| SLC24A5-EXON6F            | gctgtaatcaagtctggacaaatcta       | SLC24A5        |           |
| SLC24A5-EXON6R            | tgcgaaatagacttaataatgggcaa       | mutation       |           |
| SLC24A5-EXON7F            | tcacatcttaccattgtctgcc           |                |           |
| SLC24A5-EXON7R            | atgcaactcacaactccagt             |                |           |
| SLC24A5-EXON8F            | tctcactggcagaattttagct           |                |           |
| SLC24A5-EXON8R            | agcctttagaatgaccattgc            |                |           |
| SLC24A5-EX9F              | gtgactccagaggaaaagttac           |                |           |
| SLC24A5-EX9R              | tcatgaaaagaaagggctcaga           |                |           |
| LRMDA-EXON1F              | ataaagctgtggcatggagt             |                |           |
| LRMDA-EXON1R              | gagacctgcggtgttct                |                |           |
| LRMDA-EXON2F              | gattgatcagggaaacagtcac           |                |           |
| LRMDA-EXON2R              | cacgcatctcagagccttct             |                |           |
| LRMDA-EXON3F              | atttatcctgcaggccgtatc            |                |           |
| LRMDA-EXON3R              | gccagaagacagaatgcttg             |                |           |
| LRMDA-EXON4F              | accgtatacccacagctgaat            | Screening      |           |
| LRMDA-EXON4R              | ggaaaccactgatatgtacca            | LRMDA          |           |
| LRMDA-EXON5F              | accttgagccaagtgtacca             | mutation       |           |
| LRMDA-EXON5R              | gacccttcatgtgagattcca            |                |           |
| LRMDA-EXON6F              | ttctccaagctcagatcccaa            |                |           |
| LRMDA-EXON6R              | ttgcctcctgaatagactgct            |                |           |
| LRMDA-EXON7F              | ggagcttcatccactttctgc            |                |           |
| LRMDA-EXON7R              | aaggatcatcttgacaggcct            |                |           |
| WT.OCA2_c.808-3C>G-FW     | gaccggatcccagagatgtgagagctcaat   |                |           |
| WT.OCA2_c.808-3C>G-RV     | gaccacgcgtgctcactgtctacacagca    |                |           |
| WT.OCA2_c.2140-2A>G-FW    | gaccggatccgcccctggcttcacacctatgt | Construction   |           |
| WT.OCA2_c.2140-2A>G-RV    | gaccacgcgtccccaggacgtgttcca      | of wildtype    |           |
| WT.SLC45A2_c.1032+1G>t-FW | gaccggatcctccatggaaacctagttccatg | vectors for    |           |
| WT.SLC45A2_c.1032+1G>t-RV | gaccacgcgtcaggctccgtagtgtcctct   | splicing assay |           |
| WT.OCA2_c.2245-11T>G-RV   | gaccggatccccgtataagagccacaacagc  |                |           |
| WT.OCA2_c.2245-11T>G-RV   | gaccacgcgtatcagaaccagtcaccccag   |                |           |
| MUT.OCA2_c.808-3C>G-FW    | gctttagaggtcactcacaactg          | Mutant-direct  |           |
| MUT.OCA2_c.808-3C>G-RV    | gtgacctctacaagccaaagcataagttatg  | site with      |           |
| MUT.OCA2_c.849C>A-FW      | gagaagagagcactcagtgatgagcag      | wildtype       | 60 degree |

|                            |                                  |                                       |           |
|----------------------------|----------------------------------|---------------------------------------|-----------|
| MUT.OCA2_c.849C>A-RV       | gtgctctcttctcctcggatttaaatacac   | vectors for<br>splicing assay         |           |
| MUT.OCA2_c.2140-2A>G-FW    | cttccggatggtcccagaggagcag        |                                       |           |
| MUT.OCA2_c.2140-2A>G-RV    | ggaccatccggaaggaggacaatagcagct   |                                       |           |
| MUT.SLC45A2_c.1032+1G>t-FW | catgggccagttaatgaacgtgtctgtgca   |                                       |           |
| MUT.SLC45A2_c.1032+1G>t-RV | gttcattaactggcccatgaaatctgtgaaga |                                       |           |
| MUT.OCA2_c.2245-11T>G-FW   | gtcctcgtcctccacagattcccgt        |                                       |           |
| MUT.OCA2_c.2245-11T>G-RV   | tggaggacgaggacattgatgccacgtc     |                                       |           |
| Oligo pCAS-KO1 -F          | tgacgtcgccgcccatcac              | RT-PCR of<br>splicing assay           | 57degree  |
| Oligo pCAS - 2R            | attggtgttgagttggtgtgc            |                                       |           |
| pCAS-Seq-F                 | gggtcaatagcagtgagagg             | Sequencing of<br>vector to<br>confirm | 60 degree |
| pCAS-SeqRV                 | gctccatttcacaggtagaga            |                                       |           |
